# Supplementary material for: Associations Between Ergometer Performance, Postural Stability, Cognitive Function, and Physical Performance in Elite Adolescent Rowers
Source: Research Square preprint supplement (doi:10.21203/rs.3.rs-8256632/v1), 2025-12-26
Supplement: Supplementary file 1 [file 0871b110740dcc655bed8aed.docx]

**Tablo 1. The athletes’ demographic characteristics**

|  | **Mean ± standard deviation** |
| --- | --- |
| Age (yrs) | 14.035 ± 1.104 |
| Sport age (yrs) | 1.892 ± 1.030 |
| Height (cm) | 174.678 ± 9.249 |
| Weight (kg) | 69.396 ± 9.186 |
| Body mass index (kg/m2) | 22.702 ± 1.959 |

Abbreviations: yrs: years, cm: centimeter, kg: kilograms

**Tablo 2. The relationship between ergometer performance and muscle strength**

|  | **Biceps muscle strength (dominant extremity)** | | **Biceps muscle strength (nondominant extremity)** | | **Triceps muscle strength (dominant extremity)** | | **Triceps muscle strength (nondominant extremity)** | | **Deltoid muscle strength (dominant extremity)** | | **Deltoid muscle strength (nondominant extremity)** | | **Quadriceps muscle strength (dominant extremity)** | | **Quadriceps muscle strength (nondominant extremity)** | | **Hamstring muscle strength (dominant extremity)** | | **Hamstring muscle strength (nondominant extremity)** | |
| --- | --- | --- | --- | --- | --- | --- | --- | --- | --- | --- | --- | --- | --- | --- | --- | --- | --- | --- | --- | --- |
| **Ergometer performance** | r  -0.822 | p  <0.01 | r  -0.807 | p  <0.01 | r  -0.815 | p  <0.01 | r  -0.764 | p  <0.01 | r  -0.646 | p  <0.01 | r  -0.591 | p= 0.01 | r  -0.870 | p <0.01 | r  -0.875 | p  < 0.01 | r  -0.592 | p  <0.01 | r  -0.664 | p  < 0.01 |

**Tablo 3. The relationship between ergometer performance and reaction time**

|  | **Simple reaction time repetition count (dominant extremity)** | | **Simple reaction time repetition count (nondominant extremity)** | | **Simple reaction time duration (dominant extremity)** | | **Simple reaction time duration (nondominant extremity)** | | **Complex reaction time (repetition count)** | | **Complex reaction time (duration)** | |
| --- | --- | --- | --- | --- | --- | --- | --- | --- | --- | --- | --- | --- |
| **Ergometer performance** | r  -0.657 | p  <  0.01 | r  -0.591 | p=  0.01 | r  0.6.41 | p  <0.01 | r  0.609 | p  = 0.01 | r  -0.574 | p  = 0.01 | r  0.602 | p  = 0.01 |

**Tablo 4. The relationship between ergometer performance and static postural stability**

|  | **Static postural stability (dominant extremity)** | | **Static postural stability (nondominant extremity)** | |
| --- | --- | --- | --- | --- |
| **Ergometer performance** | **r**  **-0.474** | **p**  **= 0.01** | **r**  **-0.447** | **p**  **= 0.017** |
